# Supplementary material
Source: HighWire-hosted journal article supplement (https://www.jrheum.org/highwire/filestream/42794/field_highwire_adjunct_files/0/220526DataSuppl.pdf)
Supplement: 220526DataSuppl.pdf [file 220526DataSuppl.pdf]

**Data Supplement**

**Supplementary Figure 1. Trend of positivity of RF and anti-CCP by age of RA**

**diagnosis**

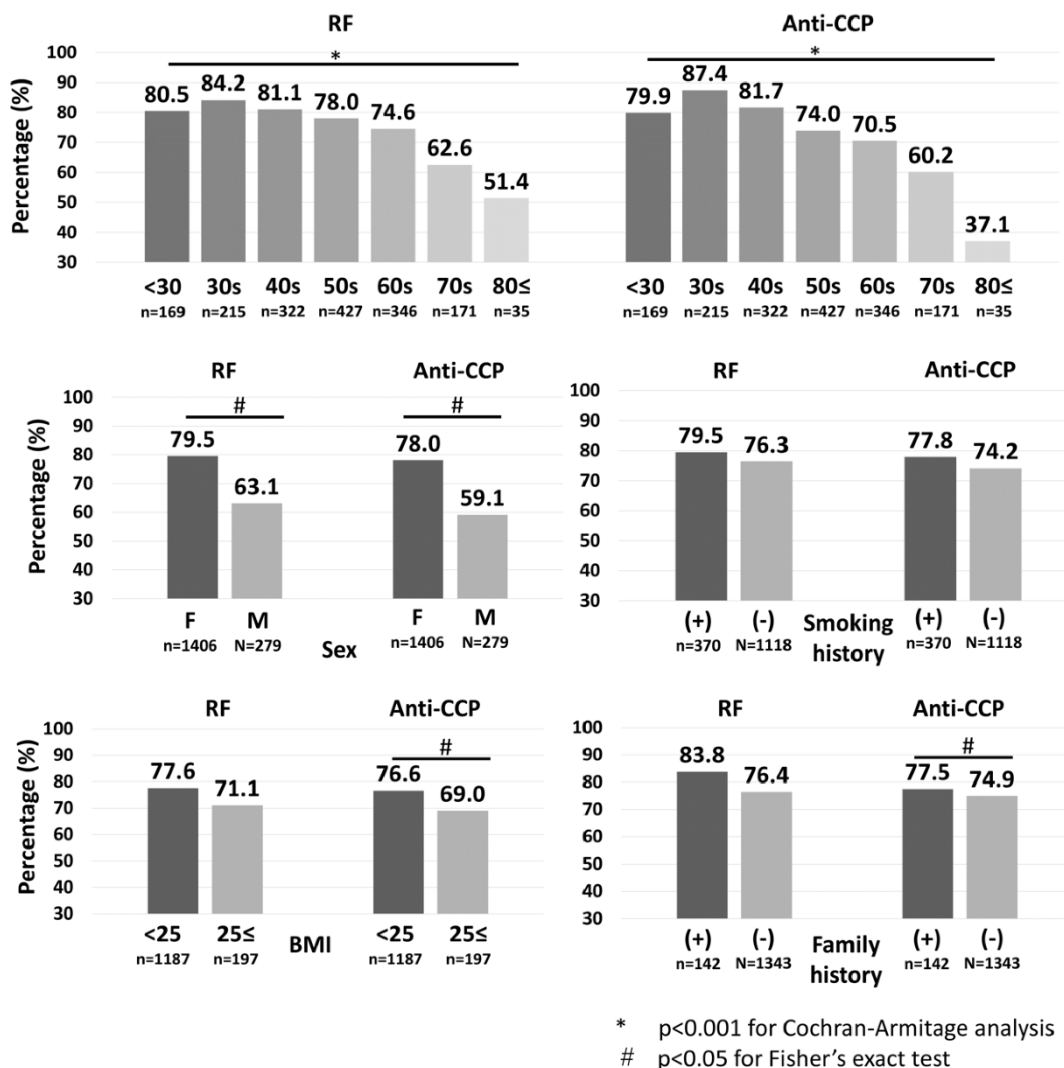

Positivity of RF and anti-CCP significantly declined along with the age at diagnosis.

anti-CCP, anti-cyclic citrullinated peptide antibody; BMI, body mass index; RF, rheumatoid factor

## Supplementary Figure 2. Trend of double positivity for RF and anti-CCP by age of

### RA diagnosis

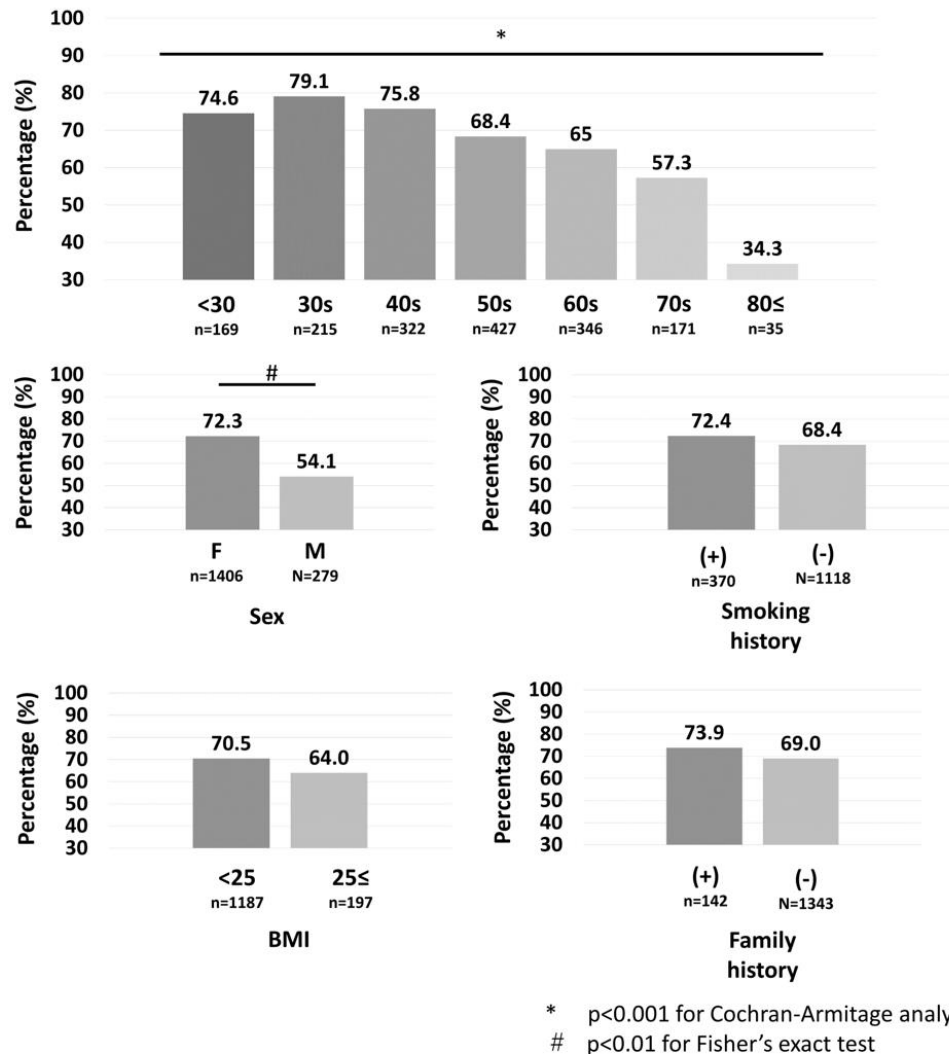

Double positivity of RF and anti-CCP significantly declined along with the age at diagnosis.

anti-CCP, anti-cyclic citrullinated peptide antibody; BMI, body mass index; RF, rheumatoid factor

Supplementary Table 1. Effect of Ageing on prevalence of RF and anti-CCP

|                             | Cochran-Armitage |                     | Binomial logistic regression |                    |                  |              |                    |                  |
|-----------------------------|------------------|---------------------|------------------------------|--------------------|------------------|--------------|--------------------|------------------|
|                             | RF<br>P value    | Anti-CCP<br>P value | OR                           | RF<br>95% CI       | P value          | OR           | Anti-CCP<br>95% CI | P value          |
| All, n=1685                 |                  |                     |                              |                    |                  |              |                    |                  |
| <b>Age at diagnosis</b>     |                  |                     | <b>0.980</b>                 | <b>0.971-0.989</b> | <b>&lt;0.001</b> | <b>0.976</b> | <b>0.967-0.985</b> | <b>&lt;0.001</b> |
| <b>Sex (female)</b>         |                  |                     | <b>2.120</b>                 | <b>1.500-3.010</b> | <b>&lt;0.001</b> | <b>2.660</b> | <b>1.860-3.720</b> | <b>&lt;0.001</b> |
| <b>Smoking history</b>      | <b>&lt;0.001</b> | <b>&lt;0.001</b>    | <b>1.620</b>                 | <b>1.160-2.260</b> | <b>0.005</b>     | <b>1.730</b> | <b>1.240-2.420</b> | <b>0.001</b>     |
| BMI (<25)                   |                  |                     | 1.270                        | 0.887-1.820        | 0.19             | 1.340        | 0.938-1.900        | 0.11             |
| Family history              |                  |                     | 1.630                        | 0.983-2.700        | 0.06             | 1.090        | 0.692-1.720        | 0.71             |
| Female, n=1406              |                  |                     |                              |                    |                  |              |                    |                  |
| <b>Age at diagnosis</b>     |                  |                     | <b>0.979</b>                 | <b>0.968-0.989</b> | <b>&lt;0.001</b> | <b>0.970</b> | <b>0.960-0.980</b> | <b>&lt;0.001</b> |
| <b>Smoking history</b>      | <b>&lt;0.001</b> | <b>&lt;0.001</b>    | 1.400                        | 0.938-2.090        | 0.10             | <b>1.630</b> | <b>1.080-2.470</b> | <b>0.02</b>      |
| BMI (<25)                   |                  |                     | 1.230                        | 0.806-1.870        | 0.34             | 1.340        | 0.884-2.20         | 0.17             |
| Family history              |                  |                     | 1.320                        | 0.770-2.250        | 0.31             | 1.020        | 0.611-1.690        | 0.95             |
| Male, n=279                 |                  |                     |                              |                    |                  |              |                    |                  |
| Age at diagnosis            |                  |                     | 0.986                        | 0.967-1.010        | 0.18             | 0.996        | 0.977-1.010        | 0.66             |
| <b>Smoking history</b>      | 0.70             | 0.66                | <b>2.120</b>                 | <b>1.190-3.770</b> | <b>0.01</b>      | <b>1.870</b> | <b>1.080-3.250</b> | <b>0.03</b>      |
| BMI (<25)                   |                  |                     | 1.430                        | 0.697-2.950        | 0.33             | 1.290        | 0.646-2.570        | 0.47             |
| <b>Family history</b>       |                  |                     | <b>4.910</b>                 | <b>1.080-22.20</b> | <b>0.04</b>      | 1.460        | 0.523-4.050        | 0.47             |
| Non-smoking history, n=1118 |                  |                     |                              |                    |                  |              |                    |                  |
| <b>Age at diagnosis</b>     |                  |                     | <b>0.978</b>                 | <b>0.968-0.988</b> | <b>&lt;0.001</b> | <b>0.973</b> | <b>0.963-0.983</b> | <b>&lt;0.001</b> |
| <b>Sex (female)</b>         | <b>&lt;0.001</b> | <b>&lt;0.001</b>    | <b>2.500</b>                 | <b>1.600-3.910</b> | <b>&lt;0.001</b> | <b>2.790</b> | <b>1.790-4.360</b> | <b>&lt;0.001</b> |
| BMI (<25)                   |                  |                     | 1.340                        | 0.886-2.020        | 0.17             | 1.340        | 0.888-2.020        | 0.16             |
| Family history              |                  |                     | 1.350                        | 0.771-2.380        | 0.29             | 1.230        | 0.714-2.130        | 0.45             |
| Smoking history, n=370      |                  |                     |                              |                    |                  |              |                    |                  |
| Age at diagnosis            | 0.16             | <b>0.02</b>         | 0.992                        | 0.971-1.010        | 0.48             | 0.989        | 0.969-1.010        | 0.33             |
| <b>Sex (female)</b>         |                  |                     | <b>1.790</b>                 | <b>1.020-3.140</b> | <b>0.04</b>      | <b>2.630</b> | <b>1.520-4.550</b> | <b>&lt;0.001</b> |
| BMI (<25)                   |                  |                     | 1.140                        | 0.535-2.420        | 0.74             | 1.300        | 0.640-2.650        | 0.47             |
| Family history              |                  |                     | 3.160                        | 0.928-10.80        | 0.07             | 0.826        | 0.358-1.900        | 0.65             |
| BMI < 25, n=1187            |                  |                     |                              |                    |                  |              |                    |                  |
| <b>Age at diagnosis</b>     |                  |                     | <b>0.978</b>                 | <b>0.968-0.987</b> | <b>&lt;0.001</b> | <b>0.974</b> | <b>0.965-0.984</b> | <b>&lt;0.001</b> |
| <b>Sex (female)</b>         | <b>&lt;0.001</b> | <b>&lt;0.001</b>    | <b>2.000</b>                 | <b>1.360-2.940</b> | <b>&lt;0.001</b> | <b>2.650</b> | <b>1.810-3.890</b> | <b>&lt;0.001</b> |
| <b>Smoking history</b>      |                  |                     | <b>1.530</b>                 | <b>1.070-2.200</b> | <b>0.02</b>      | <b>1.730</b> | <b>1.200-2.490</b> | <b>0.003</b>     |
| Family history              |                  |                     | 1.720                        | 0.968-3.070        | 0.06             | 0.940        | 0.572-1.550        | 0.81             |
| BMI ≥ 25, n=197             |                  |                     |                              |                    |                  |              |                    |                  |
| Age at diagnosis            |                  |                     | 1.000                        | 0.974-1.030        | 0.93             | 0.990        | 0.963-1.020        | 0.46             |
| <b>Sex (female)</b>         | 0.64             | 0.18                | <b>2.840</b>                 | <b>1.240-6.540</b> | <b>0.01</b>      | <b>2.630</b> | <b>1.180-5.900</b> | <b>0.02</b>      |
| Smoking history             |                  |                     | 2.270                        | 0.939-5.510        | 0.07             | 1.630        | 0.714-3.740        | 0.25             |
| Family history              |                  |                     | 1.260                        | 0.428-3.700        | 0.68             | 2.130        | 0.670-6.750        | 0.20             |

|                                |                         |                         |                     |                           |                         |                     |                           |                         |
|--------------------------------|-------------------------|-------------------------|---------------------|---------------------------|-------------------------|---------------------|---------------------------|-------------------------|
| Family history (+)             |                         |                         |                     |                           |                         |                     |                           |                         |
| n=142                          |                         |                         |                     |                           |                         |                     |                           |                         |
| <b><u>Age at diagnosis</u></b> | <b><u>0.02</u></b>      | <b><u>0.007</u></b>     | 0.971               | 0.942-1.000               | 0.07                    | <b><u>0.969</u></b> | <b><u>0.943-0.996</u></b> | <b><u>0.02</u></b>      |
| Sex (female)                   |                         |                         | 0.669               | 0.124-3.620               | 0.64                    | 1.460               | 0.440-4.880               | 0.53                    |
| Smoking habit                  |                         |                         | 2.510               | 0.618-10.20               | 0.20                    | 0.842               | 0.302-2.350               | 0.74                    |
| BMI (<25)                      |                         |                         | 1.890               | 0.679-6.170               | 0.29                    | 0.606               | 0.181-2.030               | 0.42                    |
| Family history (-)             |                         |                         |                     |                           |                         |                     |                           |                         |
| n=1343                         |                         |                         |                     |                           |                         |                     |                           |                         |
| <b><u>Age at diagnosis</u></b> | <b><u>&lt;0.001</u></b> | <b><u>&lt;0.001</u></b> | <b><u>0.981</u></b> | <b><u>0.972-0.991</u></b> | <b><u>&lt;0.001</u></b> | <b><u>0.977</u></b> | <b><u>0.967-0.986</u></b> | <b><u>&lt;0.001</u></b> |
| <b><u>Sex (female)</u></b>     | <b><u>&lt;0.001</u></b> | <b><u>&lt;0.001</u></b> | <b><u>2.280</u></b> | <b><u>1.590-3.260</u></b> | <b><u>&lt;0.001</u></b> | <b><u>2.810</u></b> | <b><u>1.960-4.030</u></b> | <b><u>&lt;0.001</u></b> |
| <b><u>Smoking habit</u></b>    |                         |                         | <b><u>1.570</u></b> | <b><u>1.110-2.210</u></b> | <b><u>0.01</u></b>      | <b><u>1.850</u></b> | <b><u>1.300-2.640</u></b> | <b><u>&lt;0.001</u></b> |
| BMI (<25)                      |                         |                         | 1.240               | 0.847-1.810               | 0.27                    | 1.450               | 0.997-2.100               | 0.05                    |

anti-CCP, anti-cyclic citrullinated peptide antibody, RA, rheumatoid arthritis; RF,

rheumatoid factor; BMI, body mass index; CI, confidence interval; OR, odds ratio
